# Supplementary material for: Nutritional and Pharmacological Targeting of the Calcium-Sensing Receptor Influences Chemically Induced Colitis in Mice
Source: MDPI journal article supplement (doi:10.3390/nu11123072), 2019-12-16
Supplement: s1 [file s1]

**Table S1. Composition of the standard semi-synthetic diet (LASCRdiet™ LasVendi).**

| Ingredients                                       | Amount (g/kg diet)      |                      |                       |                |
|---------------------------------------------------|-------------------------|----------------------|-----------------------|----------------|
|                                                   | Normal Ca <sup>2+</sup> | Low Ca <sup>2+</sup> | High Ca <sup>2+</sup> | High protein   |
| Corn Starch                                       | 465.692                 | 465.692              | 465.692               | 465.692        |
| <b>Casein (&gt; or =85% protein)</b>              | <b>140.000</b>          | <b>140.000</b>       | <b>140.000</b>        | <b>260.000</b> |
| Dextrinized Corn Starch (90-94% tetrasaccharides) | 155.000                 | 155.000              | 155.000               | 155.000        |
| Sucrose                                           | 100.000                 | 100.000              | 100.000               | 100.000        |
| Soybean Oil (no additives)                        | 40.000                  | 40.000               | 40.000                | 40.000         |
| Fiber                                             | 50.000                  | 50.000               | 50.000                | 50.000         |
| Mineral Mix (AIN-93M-MX),<br>CaCO <sub>3</sub>    | 35.000                  | 35.000               | 35.000                | 35.000         |
| <b>Supplemental CaCO<sub>3</sub></b>              | <b>12.495</b>           | <b>0.000</b>         | <b>37.485</b>         | <b>12.495</b>  |
| Vitamin Mix (AIN-93-VM)                           | 10.000                  | 10.000               | 10.000                | 10.000         |
| L-Cystine                                         | 1.800                   | 1.800                | 1.800                 | 1.800          |
| Choline Bitartrate (41.1% choline)                | 2.500                   | 2.500                | 2.500                 | 2.500          |
| Tert-butylhydroquinone                            | 0.008                   | 0.008                | 0.008                 | 0.008          |

**Table S2. Cytokine expression in the plasma.** Cytokine measurements were carried out using the 36-Plex Mouse ProcartaPlex Panel 1A. Blood was obtained by heart puncture in EDTA-free tubes and plasma was collected by centrifugation at 2000 x g for 5 minutes. Samples were pooled with a minimum of 2 per pool and measured in duplicates. N.D denotes not detected. For samples with a standard deviation= 0, data was obtained from only one technical duplicate. Data is presented as mean  $\pm$  SD (pg/ml). Statistical significance was determined by one-way ANOVA with Dunnet's multiple comparisons. P<0.05, P<0.01 and P<0.001 were regarded as statistically significant. \*Indicates comparisons to the normal diet control. # indicates comparisons to the vehicle control.

| <b>Cytokine expression in the plasma. Mean <math>\pm</math> SD (pg/ml)</b> |                                         |                                    |                                    |                                     |                                    |                            |                             |                               |                               |
|----------------------------------------------------------------------------|-----------------------------------------|------------------------------------|------------------------------------|-------------------------------------|------------------------------------|----------------------------|-----------------------------|-------------------------------|-------------------------------|
| <b>A. Th1/Th2 cytokines.</b>                                               |                                         |                                    |                                    |                                     |                                    |                            |                             |                               |                               |
|                                                                            | <b>Control<br/>(No DSS)<br/>(n= 10)</b> | <b>Normal<br/>diet<br/>(n= 10)</b> | <b>Low<br/>calcium<br/>(n= 10)</b> | <b>High<br/>calcium<br/>(n= 10)</b> | <b>High<br/>protein<br/>(n= 9)</b> | <b>Vehicle<br/>(n= 16)</b> | <b>NPS-2143<br/>(n= 23)</b> | <b>GSK3004774<br/>(n= 18)</b> | <b>Cinacalcet<br/>(n= 15)</b> |
| IFN- $\gamma$                                                              | 1.9 $\pm$ 0.6                           | 2.2 $\pm$ 1                        | 3 $\pm$ 2.7                        | 3.7 $\pm$ 0 <sup>#</sup>            | 12.7 $\pm$<br>14.8                 | 1.7 $\pm$ 1                | 1.4 $\pm$ 0.8               | 2.4 $\pm$ 2.2                 | 1 $\pm$ 0.2                   |
| IL-5                                                                       | 9.8 $\pm$ 2.1                           | 6.6 $\pm$ 0                        | 8.2 $\pm$ 0                        | 4.3 $\pm$ 0                         | 8.6 $\pm$ 6                        | 6.7 $\pm$ 4                | 15.2 $\pm$<br>12.9*         | 4.3 $\pm$ 0                   | 3.2 $\pm$ 1.5                 |
| IL-6                                                                       | 24 $\pm$ 10.1                           | 42.3 $\pm$ 0.5                     | 39.3 $\pm$ 6                       | 34.6 $\pm$ 0                        | 756.4 $\pm$<br>1006.1 <sup>#</sup> | 32.8 $\pm$<br>20.3         | 50.3 $\pm$<br>45.2          | 43.6 $\pm$ 58.6               | 160.3 $\pm$<br>293.3*         |
| IL-12p70                                                                   | 15.3 $\pm$ 3.3                          | 12.4 $\pm$ 2.9                     | 8.4 $\pm$ 2.9 <sup>#</sup>         | 9.1 $\pm$ 0 <sup>#</sup>            | 12.5 $\pm$ 3.3                     | 8.9 $\pm$ 5.4              | 7.2 $\pm$ 4.2               | 8.2 $\pm$ 1.4                 | 6 $\pm$ 4.2                   |
| IL-13                                                                      | 12.1 $\pm$ 8.6                          | 3.2 $\pm$ 0.2                      | 9.4 $\pm$ 2.8 <sup>#</sup>         | 5.9 $\pm$ 0 <sup>#</sup>            | 4.5 $\pm$ 2                        | 4.8 $\pm$ 3.4              | 2.4 $\pm$ 3.1*              | 2.5 $\pm$ 2                   | 2.9 $\pm$ 1.9                 |
| IL-18                                                                      | 203 $\pm$ 43                            | 292.2 $\pm$<br>42.2                | 240.1 $\pm$<br>70.6 <sup>#</sup>   | N.D                                 | 669.3 $\pm$ 0                      | 230.4 $\pm$ 0              | 149.9 $\pm$ 0               | 397.7 $\pm$ 0                 | 227.3 $\pm$ 85.1              |
| TNF $\alpha$                                                               | 9.4 $\pm$ 2.3                           | 11.3 $\pm$ 0.5                     | 11 $\pm$ 1.9                       | 10.5 $\pm$ 0                        | 47.3 $\pm$<br>49.3 <sup>#</sup>    | 9 $\pm$ 1.3                | 10.5 $\pm$ 2.1              | 10.3 $\pm$ 8                  | 39.3 $\pm$ 60.8*              |
| <b>B. Th9/Th17/Th22/Treg cytokines.</b>                                    |                                         |                                    |                                    |                                     |                                    |                            |                             |                               |                               |
| IL-9                                                                       | 162.2 $\pm$<br>98.3                     | 65.9 $\pm$<br>14.7                 | 91.6 $\pm$<br>9.7 <sup>#</sup>     | 62.4 $\pm$ 0                        | 106.3 $\pm$<br>27 <sup>#</sup>     | 48.7 $\pm$<br>18.3         | 46.1 $\pm$<br>13.7          | 54 $\pm$ 19.8                 | 53 $\pm$ 32.1                 |
| IL-22                                                                      | 74.7 $\pm$ 0                            | 100.3 $\pm$<br>36.2                | 74.7 $\pm$ 0                       | 57.3 $\pm$ 0                        | 195.6 $\pm$<br>73.8 <sup>#</sup>   | 59.1 $\pm$<br>39.6         | 65.1 $\pm$<br>36.8          | 143.3 $\pm$ 0                 | 186.4 $\pm$<br>198.5*         |
| IL-23                                                                      | 5.8 $\pm$ 1.9                           | 5.8 $\pm$ 0                        | 8.7 $\pm$ 2.3 <sup>#</sup>         | 3.5 $\pm$ 0                         | 6.9 $\pm$ 4.8                      | 3.1 $\pm$ 0.7              | 4.6 $\pm$ 1.6*              | 6.2 $\pm$ 2.9*                | 4.1 $\pm$ 0.8                 |
| IL-27                                                                      | 167 $\pm$<br>118.1                      | 29.8 $\pm$<br>23.3                 | 31.3 $\pm$ 6.4                     | 35.9 $\pm$ 0                        | 58.8 $\pm$<br>35.8 <sup>#</sup>    | 17.7 $\pm$ 14              | 30.9 $\pm$<br>16.9          | 20.2 $\pm$ 17.2               | 37.6 $\pm$ 23.1*              |
| <b>C. Cytokines and chemokines.</b>                                        |                                         |                                    |                                    |                                     |                                    |                            |                             |                               |                               |
| Eotaxin                                                                    | 2706.4 $\pm$<br>165.3                   | 2853.6 $\pm$<br>471.7              | 2657.9 $\pm$<br>30.4               | 2613.9 $\pm$ 0                      | 3141.6 $\pm$<br>247.7              | 2707.7 $\pm$<br>406.8      | 2459.8 $\pm$<br>715.4       | 2610.9 $\pm$<br>716.8         | 2971.5 $\pm$ 591              |
| GRO- $\alpha$ /kc                                                          | 13.5 $\pm$ 0                            | 27.7 $\pm$<br>21.2                 | 22.9 $\pm$ 1.8                     | 9.4 $\pm$ 0                         | 40.9 $\pm$<br>39.6                 | 76.3 $\pm$<br>50.9         | 54.3 $\pm$<br>33.4          | 81.7 $\pm$ 65                 | 89.1 $\pm$ 89.9               |
| IP-10                                                                      | 37.4 $\pm$ 5.1                          | 36.1 $\pm$ 7.6                     | 47.4 $\pm$<br>1.9 <sup>#</sup>     | 32.4 $\pm$ 0                        | 48.4 $\pm$ 12 <sup>#</sup>         | 39.5 $\pm$<br>11.8         | 36.3 $\pm$<br>16.4          | 38.7 $\pm$ 13.6               | 38.4 $\pm$ 14.7*              |
| MCP-3                                                                      | 72 $\pm$ 4.3                            | 107.4 $\pm$<br>9.4                 | 112.7 $\pm$<br>21.4                | 118.7 $\pm$ 0                       | 181.6 $\pm$<br>103.3 <sup>#</sup>  | 114 $\pm$<br>29.2          | 143 $\pm$ 38                | 95.7 $\pm$ 45.1               | 210.1 $\pm$ 192.9             |
| MIP-1a                                                                     | 3.6 $\pm$ 1.8                           | 1.6 $\pm$ 0.2                      | 1.8 $\pm$ 0.4                      | 1.6 $\pm$ 0                         | 3.3 $\pm$ 0.9 <sup>#</sup>         | 1.5 $\pm$ 0.3              | 1.8 $\pm$ 0.6               | 2.2 $\pm$ 1                   | 2.6 $\pm$ 1.5                 |
| RANTES                                                                     | 46 $\pm$ 12.1                           | 41 $\pm$ 4.6                       | 46.6 $\pm$<br>17.4                 | 35.9 $\pm$ 0                        | 45.1 $\pm$ 4.2                     | 30.4 $\pm$ 6.8             | 26.9 $\pm$ 9.3              | 27 $\pm$ 10.7                 | 34.6 $\pm$ 12.1               |
| MIP-1b                                                                     | 2.4 $\pm$ 0.4                           | 2.1 $\pm$ 0.1                      | 2.3 $\pm$ 0.2 <sup>#</sup>         | 2 $\pm$ 0                           | 3 $\pm$ 0.1 <sup>#</sup>           | 2.1 $\pm$ 0.2              | 2.4 $\pm$ 0.4               | 2 $\pm$ 0.3                   | 2.6 $\pm$ 0.7*                |
| MIP-2                                                                      | 3.6 $\pm$ 0.6                           | 2.5 $\pm$ 0                        | 4 $\pm$ 0.7                        | 2.7 $\pm$ 0                         | 7.8 $\pm$ 6.4 <sup>#</sup>         | 3.4 $\pm$ 0.4              | 3.2 $\pm$ 0.8               | 4.7 $\pm$ 1.3                 | 8 $\pm$ 5*                    |
| G-CSF/CSF-3                                                                | 1.9 $\pm$ 0.5                           | 23.7 $\pm$<br>10.5                 | 9.8 $\pm$ 0.1                      | 11.5 $\pm$ 0                        | 260.2 $\pm$<br>258 <sup>#</sup>    | 54 $\pm$ 78.6              | 33.7 $\pm$ 8.2              | 39.1 $\pm$ 48.6               | 280.7 $\pm$ 361*              |
| IL-1 $\alpha$                                                              | 1.6 $\pm$ 0.3                           | 5.5 $\pm$ 0.9                      | 4.2 $\pm$ 0.7                      | 2.2 $\pm$ 0                         | 21.4 $\pm$ 13.6 <sup>#</sup>       | 9.9 $\pm$ 10.9             | 6.2 $\pm$ 0.8               | 6.7 $\pm$ 6.6                 | 23 $\pm$ 17.9*                |

**Table S3. Cytokine expression in the right colon.** Cytokine measurements were carried out using the 36-Plex Mouse ProcartaPlex Panel 1A. PBS-flushed colons were separated into right and left sections and lysed in procartaplex buffer. Lysates were then quantified by the BCA method, pooled with a minimum of 2 per pool and measured in duplicates (250 µg/ pool). Data is presented as mean ± SD (pg/ml). Statistical significance was determined by one-way ANOVA with Dunnet's multiple comparisons. P<0.05, P<0.01 and P<0.001 were regarded as statistically significant. \*Indicates comparisons to the normal diet control. # indicates comparisons to the vehicle control.

| Cytokine expression in the right colon. Mean ± SD (pg/ml) |                                |                           |                           |                            |                              |                    |                     |                       |                       |
|-----------------------------------------------------------|--------------------------------|---------------------------|---------------------------|----------------------------|------------------------------|--------------------|---------------------|-----------------------|-----------------------|
| A. Th1/Th2 cytokines. Mean ± SD (pg/ml)                   |                                |                           |                           |                            |                              |                    |                     |                       |                       |
|                                                           | Control<br>(No DSS)<br>(n= 10) | Normal<br>diet<br>(n= 10) | Low<br>calcium<br>(n= 10) | High<br>calcium<br>(n= 10) | High<br>protein<br>(n= 9)    | Vehicle<br>(n= 16) | NPS-2143<br>(n= 23) | GSK3004774<br>(n= 18) | Cinacalcet<br>(n= 15) |
| GM-CSF                                                    | 1.3 ± 0.2                      | 1.7 ± 1.2                 | 1.6 ± 0                   | 0.9 ± 0.5                  | 2.4 ± 1.3                    | 6.9 ± 8.1          | 8.2 ± 2.2           | 7 ± 1.6               | 7.3 ± 1.3             |
| IFN-γ                                                     | 7 ± 0.2                        | 2.3 ± 0.4                 | 1.7 ± 0.4 <sup>#</sup>    | 1.7 ± 0.2 <sup>#</sup>     | 2 ± 0.6                      | 7.6 ± 1.8          | 5.7 ± 1.3*          | 4.7 ± 1.1*            | 4.9 ± 0.6*            |
| IL-1β                                                     | 8.6 ± 0.3                      | 13 ± 10.4                 | 4.9 ± 1.5 <sup>#</sup>    | 6.2 ± 1.3 <sup>#</sup>     | 7.8 ± 1.5                    | 27.6 ± 23.9        | 21.7 ± 11.9         | 23.8 ± 6.1            | 24.6 ± 11             |
| IL-12p70                                                  | 4.2 ± 0.7                      | 6.9 ± 1.9                 | 10 ± 6.5                  | 5.6 ± 1.5                  | 4.9 ± 1.3                    | 18.7 ± 8.2         | 29.1 ± 8.4*         | 26.2 ± 12.1*          | 19.8 ± 3.7            |
| IL-13                                                     | 9.2 ± 0.5                      | 4.4 ± 1                   | 3.4 ± 0.6 <sup>#</sup>    | 3.3 ± 0.4 <sup>#</sup>     | 3.9 ± 1.1                    | 12 ± 3.1           | 12 ± 1.4            | 10.2 ± 2.1*           | 10.6 ± 1.1            |
| IL-18                                                     | 351.9 ±<br>16.1                | 351.1 ±<br>57.7           | 414 ±<br>177.1            | 297.4 ±<br>20.4            | 414.9 ±<br>78.1              | 3107.2 ±<br>3209.5 | 4572.6 ±<br>1375.5  | 4853.6 ±<br>1961.6    | 11636.1 ±<br>10844.9* |
| IL-2                                                      | 5.3 ± 0.5                      | 0.7 ± 0.6                 | 0.7 ± 0.8                 | 0.4 ± 0.2                  | 0.7 ± 0.9                    | 7.7 ± 3            | 6.9 ± 0.8           | 5.8 ± 1.3*            | 5.8 ± 0.6*            |
| IL-4                                                      | 4.1 ± 0.4                      | 2.4 ± 0.4                 | 2.3 ± 0.6                 | 2.4 ± 0.1                  | 2.2 ± 0.5                    | 5.5 ± 1.3          | 6.3 ± 1.1           | 5.9 ± 1.6             | 5.9 ± 0.5             |
| IL-5                                                      | 16.8 ± 0.2                     | 7.4 ± 2.8                 | 5.1 ± 1.9                 | 4.6 ± 0.7 <sup>#</sup>     | 6 ± 3.1                      | 17.6 ± 6.9         | 17 ± 2.9            | 14.1 ± 5.3            | 12.8 ± 1.8*           |
| IL-6                                                      | 40.3 ± 4.3                     | 60.2 ± 37.6               | 38.2 ± 26.4               | 24.5 ± 7 <sup>#</sup>      | 72.4 ± 22                    | 1443 ±<br>3035.3   | 603.1 ±<br>1273.5   | 330.6 ±<br>286.7      | 408.6 ±<br>478.5      |
| TNF- α                                                    | 56.3 ± 3.5                     | 33.8 ± 9                  | 22.9 ± 3.3 <sup>#</sup>   | 21.2 ± 3.7 <sup>#</sup>    | 25.9 ± 10.4                  | 84 ± 19.5          | 80.5 ± 8            | 68.9 ± 12.9*          | 72.8 ± 9.6*           |
| B. Th9/Th17/Th22/Treg cytokines.                          |                                |                           |                           |                            |                              |                    |                     |                       |                       |
| IL-10                                                     | 178.5 ± 8.4                    | 92.7 ± 21.4               | 68 ± 22 <sup>#</sup>      | 82.5 ± 10.9                | 77.6 ± 21.4                  | 232.3 ±<br>14.9    | 285.5 ±<br>36*      | 261.3 ± 41.5*         | 250.4 ±<br>21.8       |
| IL-17A                                                    | 214.1 ±<br>15.1                | 180.7 ±<br>86.4           | 121.5 ±<br>33.5           | 192.3 ±<br>65.4            | 255.2 ±<br>45.2 <sup>#</sup> | 273.8 ±<br>52.5    | 340.3 ±<br>60.7*    | 301.2 ± 73.8          | 306.9 ±<br>55.1       |
| IL-22                                                     | 11.1 ± 1.7                     | 19.8 ± 15.5               | 24.8 ± 16.1               | 17 ± 4.4                   | 10.9 ± 3.7 <sup>#</sup>      | 66.9 ± 81.9        | 44.3 ± 6.9          | 46.4 ± 14.8           | 47 ± 6.1              |
| IL-23                                                     | 7.5 ± 3.6                      | 1.8 ± 0.1                 | 1.6 ± 0.1                 | 1.6 ± 0.1                  | 1.7 ± 0.2                    | 12.4 ± 6.6         | 10.3 ± 1.9*         | 8.4 ± 1.7*            | 8.2 ± 2.3*            |
| IL-27                                                     | 92.1 ± 4.6                     | 32.2 ± 3.7                | 33 ± 5.6                  | 32.2 ± 2.5                 | 30.9 ± 3.6                   | 141.8 ± 4.7        | 142.7 ±<br>13.8     | 140.4 ± 22.2          | 136.1 ± 8.2           |
| IL-9                                                      | 317.2 ±<br>12.4                | 173.4 ±<br>47.3           | 135.3 ±<br>18.8           | 148.6 ±<br>26.2            | 168.4 ±<br>53.4              | 406.7 ±<br>112.9   | 432.8 ±<br>73.9     | 378.1 ± 97.1          | 384.8 ±<br>33.6       |
| C. Chemokines.                                            |                                |                           |                           |                            |                              |                    |                     |                       |                       |

Supplementary tables

|                      |                |                           |                            |                             |                         |                  |                            |                            |                             |
|----------------------|----------------|---------------------------|----------------------------|-----------------------------|-------------------------|------------------|----------------------------|----------------------------|-----------------------------|
| ENA-78               | 171 ± 23.3     | 187.6 ± 79.7              | 77.6 ± 32.8 <sup>#</sup>   | 80.5 ± 27.1 <sup>#</sup>    | 207.5 ± 79.8            | 331.3 ± 106.7    | 256.3 ± 79.5 <sup>*</sup>  | 228.3 ± 46.8 <sup>*</sup>  | 216 ± 49.1 <sup>*</sup>     |
| G-CSF/CSF-3          | 7.6 ± 0.7      | 3.7 ± 1.3                 | 2.6 ± 0.8                  | 2.3 ± 0                     | 4.3 ± 1                 | 208.5 ± 425.2    | 246.1 ± 545                | 64.4 ± 56.5                | 145.4 ± 151.3               |
| IFN- α               | 227.8 ± 67.4   | 72.9 ± 28.1               | 39.4 ± 26.1 <sup>#</sup>   | N.D                         | 25.7 ± 0                | 987.1 ± 548.9    | 1534.9 ± 74.1 <sup>*</sup> | 1523.8 ± 30.8 <sup>*</sup> | 1523.9 ± 63.6 <sup>*</sup>  |
| IL-1α                | 17.2 ± 0.4     | 11.9 ± 2.6                | 8.2 ± 1.2 <sup>#</sup>     | 8.8 ± 1.2 <sup>#</sup>      | 11.2 ± 3.8              | 26.7 ± 9.6       | 18.4 ± 3.8 <sup>*</sup>    | 15.5 ± 2.8 <sup>*</sup>    | 15.4 ± 3.6 <sup>*</sup>     |
| IL-15/IL-15R         | 12.2 ± 1.4     | 3.6 ± 0.7                 | 2.8 ± 0.4                  | 2.9 ± 0.5                   | 3.4 ± 1.1               | 24.7 ± 7.8       | 28.3 ± 3.6                 | 27.9 ± 3.7                 | 26.5 ± 3                    |
| IL-28                | 9896.7 ± 502.1 | 5744.1 ± 1264.7           | 4677.6 ± 743 <sup>#</sup>  | 5844.7 ± 415.4              | 4938.9 ± 826.7          | 12870.9 ± 1721.7 | 12881.9 ± 850.1            | 11898.9 ± 1506.6           | 12022.6 ± 1301.1            |
| IL-3                 | 0.5 ± 0        | 0.2 ± 0                   | 0.2 ± 0                    | 0.2 ± 0                     | 0.2 ± 0                 | 0.8 ± 0          | 1.1 ± 0.2 <sup>*</sup>     | 1 ± 0.2                    | 1 ± 0.1 <sup>*</sup>        |
| IL-31                | 127.5 ± 5.9    | 45.3 ± 12.3               | 34.3 ± 3.7 <sup>#</sup>    | 38.8 ± 5.2                  | 40.5 ± 12.1             | 142.1 ± 44.8     | 169 ± 53.5                 | 133 ± 58.1                 | 138.9 ± 26.8                |
| LIF                  | 45.9 ± 4.8     | 36.4 ± 13                 | 30.7 ± 6.7                 | 30.5 ± 4.8                  | 42.9 ± 7                | 442.3 ± 870.2    | 208 ± 316.7                | 115.7 ± 44                 | 182.4 ± 144.9               |
| M-CSF                | 4 ± 0.1        | 1.6 ± 0.3                 | 1.7 ± 0.1                  | 2.2 ± 0.1 <sup>#</sup>      | 1.6 ± 0.1               | 5.8 ± 1.6        | 6.1 ± 2.9                  | 4.8 ± 0.8                  | 4.6 ± 0.5                   |
| <b>D. Cytokines.</b> |                |                           |                            |                             |                         |                  |                            |                            |                             |
| Eotaxin              | 5742.7 ± 219.2 | 6003.3 ± 367.4            | 5526.9 ± 220.8             | 5777.1 ± 369.2              | 6484.5 ± 120.8          | 6047.3 ± 1682.7  | 7261.6 ± 303.5             | 7476.6 ± 153.7             | 7325.7 ± 412.8              |
| GRO-α/kc             | 97.4 ± 9.8     | 211.5 ± 65.6 <sup>#</sup> | 127.6 ± 12.6 <sup>#</sup>  | 128.3 ± 31.8 <sup>#</sup>   | 265.1 ± 53.4            | 495.9 ± 624.6    | 457.1 ± 517.6              | 381.2 ± 95.1               | 427.3 ± 274.5               |
| IP-10                | 311.7 ± 57.6   | 479.7 ± 180               | 291.6 ± 91.6 <sup>#</sup>  | 477.4 ± 42.1                | 452.9 ± 175.8           | 480.7 ± 158.9    | 433.2 ± 157.7              | 395.9 ± 109.1              | 351.4 ± 39.7 <sup>*</sup>   |
| MCP-1                | 75.9 ± 21.8    | 435.2 ± 116.9             | 201 ± 96.6 <sup>#</sup>    | 192.9 ± 35.3 <sup>#</sup>   | 526.1 ± 224.2           | 2118.9 ± 3349.7  | 1677.4 ± 2937.5            | 856.4 ± 197                | 696.9 ± 448.8               |
| MCP-3                | 272.6 ± 27.3   | 353.1 ± 127.4             | 246.9 ± 41.8 <sup>#</sup>  | 291.5 ± 51                  | 366.6 ± 38.9            | 416.2 ± 224.7    | 410.9 ± 64.3               | 610.2 ± 136.5 <sup>*</sup> | 470.8 ± 179.4               |
| MIP-1 α              | 6.9 ± 0.4      | 14.7 ± 4.9                | 10.1 ± 0.9 <sup>#</sup>    | 13.2 ± 1.7                  | 16.4 ± 4.2              | 69.7 ± 122.1     | 41.5 ± 41.5                | 31.4 ± 6.4                 | 28.6 ± 15.2                 |
| MIP-1β               | 6.7 ± 0.1      | 11.5 ± 1.8                | 7.9 ± 1.7 <sup>#</sup>     | 9.3 ± 0.3 <sup>#</sup>      | 13.4 ± 2.3 <sup>#</sup> | 40.5 ± 55.7      | 18.8 ± 11.2                | 19.5 ± 10.2                | 18.2 ± 11.9                 |
| MIP-2                | 8.7 ± 0.6      | 32.9 ± 34.3               | 6.9 ± 1.4 <sup>#</sup>     | 7.2 ± 0.8 <sup>#</sup>      | 29.3 ± 15.2             | 123.4 ± 245      | 63.8 ± 109.7               | 34.1 ± 24.5                | 57.5 ± 65.4                 |
| RANTES               | 832.4 ± 241.5  | 635.6 ± 192.4             | 980.6 ± 151.6 <sup>#</sup> | 1034.5 ± 117.9 <sup>#</sup> | 785.9 ± 197.6           | 1850.4 ± 786.4   | 1477.6 ± 425.3             | 1562.9 ± 527               | 1235.5 ± 347.5 <sup>*</sup> |

**Table S4. Cytokine expression in the left colon.** Cytokine measurements were carried out using the 36-Plex Mouse ProcartaPlex Panel 1A. PBS-flushed colons were separated into right and left sections and lysed in procartaplex buffer. Lysates were then quantified by the BCA method, pooled with a minimum of 2 per pool and measured in duplicates (250 µg/ pool). Data is presented as mean ± SD (pg/ml). Statistical significance was determined by one-way ANOVA with Dunnet's multiple comparisons. P<0.05, P<0.01 and P<0.001 were regarded as statistically significant. \*Indicates comparisons to the normal diet control. #Indicates comparisons to the vehicle control.

| Cytokine expression in the left colon. Mean ± SD (pg/ml) |                                |                           |                              |                                 |                                |                    |                     |                       |                       |
|----------------------------------------------------------|--------------------------------|---------------------------|------------------------------|---------------------------------|--------------------------------|--------------------|---------------------|-----------------------|-----------------------|
| A. Th1/Th2 cytokines.                                    |                                |                           |                              |                                 |                                |                    |                     |                       |                       |
|                                                          | Control<br>(No DSS)<br>(n= 10) | Normal<br>diet<br>(n= 10) | Low<br>calcium<br>(n= 10)    | High<br>calcium<br>(n= 10)      | High<br>protein<br>(n= 9)      | Vehicle<br>(n= 16) | NPS-2143<br>(n= 23) | GSK3004774<br>(n= 18) | Cinacalcet<br>(n= 15) |
| GM-CSF                                                   | 4.9 ± 1.5                      | 3.2 ± 0                   | N.D                          | 14.7 ± 12.6                     | 4.5 ± 0.9                      | 14.1 ± 7.7         | 7.4 ± 1             | 8.5 ± 2               | 7.5 ± 1.7             |
| IFN-γ                                                    | 4.9 ± 3.8                      | 2.7 ± 0.3                 | 2.4 ± 0.4                    | 4.5 ± 2.5 <sup>#</sup>          | 11.3 ± 1.6 <sup>#</sup>        | 7 ± 1.4            | 5.4 ± 0.9*          | 4.8 ± 1.3*            | 4.5 ± 0.7*            |
| IL-1β                                                    | 13.1 ± 2.7                     | 8.6 ± 3                   | 5.5 ± 2.4                    | 42.6 ±<br>13.7 <sup>#</sup>     | 14.4 ± 7.3                     | 52.1 ± 29.9        | 30.9 ± 8.5          | 68 ± 50               | 49.3 ± 24.9           |
| IL-12p70                                                 | 7.6 ± 1.3                      | 10.1 ± 3.1                | 5.1 ± 0.5                    | 31.8 ± 38.4                     | 39.8 ±<br>21.4 <sup>#</sup>    | 59.6 ± 28          | 34.3 ±<br>12.1*     | 22.7 ± 4*             | 19.3 ± 4.1*           |
| IL-13                                                    | 7.7 ± 5.2                      | 4.9 ± 0.7                 | 4 ± 0.9                      | 5.8 ± 2.8                       | 12.2 ± 2.1 <sup>#</sup>        | 9.2 ± 0.8          | 8.1 ± 0.5*          | 8.3 ± 0.6*            | 7.9 ± 0.8*            |
| IL-18                                                    | 420.6 ±<br>33.7                | 353.6 ±<br>52.7           | 411.9 ±<br>172.7             | 755.2 ±<br>578.5 <sup>#</sup>   | 2499.2 ±<br>289.1 <sup>#</sup> | 1303.8 ±<br>788.8  | 1260 ±<br>740.2     | 782 ± 313.7           | 1056.2 ±<br>784.8     |
| IL-2                                                     | 4.7 ± 4.5                      | 1.5 ± 0                   | N.D                          | 1.7 ± 0.6                       | 7.1 ± 1.8                      | 4.8 ± 1.2          | 4.3 ± 0.9           | 4 ± 0.7*              | 3.7 ± 0.6*            |
| IL-4                                                     | 4 ± 0.6                        | 3.9 ± 1.3                 | 3.2 ± 0.6                    | 4.5 ± 1.6                       | 7.7 ± 1 <sup>#</sup>           | 5.8 ± 0.9          | 6 ± 1.2             | 5.6 ± 1.3             | 5 ± 0.6               |
| IL-5                                                     | 13 ± 7                         | 9.7 ± 1.5                 | 7.3 ± 1.3                    | 10.3 ± 5.7                      | 21.8 ± 4.6 <sup>#</sup>        | 12.8 ± 4           | 9.9 ± 0.6*          | 8.7 ± 2.1*            | 7.2 ± 0.4*            |
| IL-6                                                     | 135.5 ±<br>68.2                | 49.9 ± 27                 | 25.9 ± 11.2                  | 2041.5 ±<br>3040.8 <sup>#</sup> | 118.1 ±<br>25.4                | 1011 ±<br>590.9    | 406.9 ±<br>291.3*   | 824.4 ± 683           | 675.9 ±<br>564.2      |
| TNF-α                                                    | 52.7 ± 26.3                    | 34.7 ± 7.8                | 32.7 ± 5                     | 62.1 ±<br>44.6 <sup>#</sup>     | 71.9 ±<br>16.9 <sup>#</sup>    | 73.6 ± 15.8        | 61.1 ± 7.1*         | 64.7 ± 9              | 63.1 ±<br>12.3*       |
| B. Th9/Th17/Th22/Treg cytokines.                         |                                |                           |                              |                                 |                                |                    |                     |                       |                       |
| IL-10                                                    | 146.8 ±<br>59.3                | 128.1 ±<br>17.7           | 108.7 ±<br>10 <sup>#</sup>   | 76.8 ± 3.9 <sup>#</sup>         | 228.7 ±<br>19.8 <sup>#</sup>   | 198.4 ±<br>57.6    | 235 ± 23.7          | 229.4 ± 17.3          | 229.8 ±<br>14.2       |
| IL-17A                                                   | 307.4 ±<br>129.7               | 211 ± 75.1                | 166.7 ±<br>61.7              | 863.2 ±<br>253.5 <sup>#</sup>   | 336 ± 28.1                     | 366.5 ±<br>157.8   | 411.1 ±<br>76.6     | 368.3 ±<br>111.4      | 349.4 ±<br>85.2       |
| IL-22                                                    | 32.1 ± 18.2                    | 16.3 ± 6.8                | 5.9 ± 2.3                    | 123.3 ±<br>21.9 <sup>#</sup>    | 20.1 ± 7.7                     | 79.6 ± 58.9        | 50 ± 11             | 59.7 ± 27.9           | 83.2 ± 62.6           |
| IL-23                                                    | 3.4 ± 3.1                      | 2 ± 0.1                   | 1.7 ± 0                      | 2 ± 0                           | 8.2 ± 3.1                      | 4.3 ± 0.8          | 4.5 ± 0.5           | 5.9 ± 0.9             | 4.4 ± 0.6             |
| IL-27                                                    | 63.1 ± 64.5                    | 29 ± 5.2                  | 24.1 ± 2.3                   | 41.5 ± 17.1                     | 99.3 ±<br>24.6 <sup>#</sup>    | 92 ± 34.4          | 107.6 ± 6.1         | 130.5 ± 34.9*         | 116.2 ± 10*           |
| IL-9                                                     | 298.1 ±<br>137.1               | 210.3 ±<br>37.7           | 183.1 ±<br>33.2              | 319.7 ±<br>65.9                 | 421.8 ±<br>78.9                | 323.7 ±<br>30.2    | 318.9 ±<br>24.7     | 280.1 ± 43.9          | 267.1 ±<br>20.7       |
| C. Chemokines.                                           |                                |                           |                              |                                 |                                |                    |                     |                       |                       |
| ENA-78<br>(LIX)                                          | 502 ±<br>234.6                 | 216.9 ±<br>103.7          | 107.1 ±<br>54.3 <sup>#</sup> | 1095.8 ±<br>143.2 <sup>#</sup>  | 269.8 ±<br>41.2                | 416.5 ±<br>85.4    | 471.6 ±<br>265.8*   | 421.5 ±<br>124.8      | 439.9 ±<br>196.1      |

Supplementary tables

|                      |                 |                |                            |                              |                               |                  |                              |                              |                              |
|----------------------|-----------------|----------------|----------------------------|------------------------------|-------------------------------|------------------|------------------------------|------------------------------|------------------------------|
| G-CSF/CSF-3          | 9.9 ± 4.6       | 4.2 ± 1        | 2.2 ± 0.4                  | 95.1 ± 147.7 <sup>#</sup>    | 13.3 ± 4.2 <sup>#</sup>       | 87 ± 132.2       | 321.7 ± 683.6                | 109.3 ± 89.2                 | 203.5 ± 195.2                |
| IFN-α                | 362.6 ± 0       | N.D            | N.D                        | N.D                          | 199.5 ± 88.5                  | 1355.9 ± 99.6    | 1427.6 ± 69.3 <sup>*</sup>   | 1444.2 ± 72 <sup>*</sup>     | 1417.5 ± 40 <sup>*</sup>     |
| IL-1α                | 19.2 ± 4.4      | 13.8 ± 3.6     | 10.3 ± 2.3                 | 40.9 ± 7.6 <sup>#</sup>      | 22.1 ± 2.5 <sup>#</sup>       | 22.8 ± 2.7       | 25.4 ± 15.8                  | 31 ± 11.4                    | 31.5 ± 20.2                  |
| IL-15/IL-15R         | 7.6 ± 6.3       | 4.3 ± 0.4      | 3.2 ± 0.9                  | 4.3 ± 1                      | 24.7 ± 9.1 <sup>#</sup>       | 21.4 ± 12.6      | 28.4 ± 5.5                   | 27.8 ± 3.1                   | 24.8 ± 2.6                   |
| IL-28                | 9275.9 ± 2739.1 | 7007.6 ± 689.7 | 6713.5 ± 322.8             | 7465 ± 1418.1                | 11562.7 ± 1507.7 <sup>#</sup> | 10657.6 ± 1865.8 | 12187.4 ± 665.5 <sup>*</sup> | 10775.8 ± 1757               | 10387.9 ± 1197.4             |
| IL-3                 | 0.4 ± 0.2       | 0.2 ± 0        | 0.2 ± 0                    | 0.2 ± 0                      | 0.6 ± 0.1                     | 0.6 ± 0.2        | 0.9 ± 0.1                    | 0.9 ± 0.1                    | 0.9 ± 0                      |
| IL-31                | 91.9 ± 61.8     | 59.2 ± 11.1    | 46.2 ± 13.3                | 39.6 ± 2.1 <sup>#</sup>      | 164.2 ± 24.4 <sup>#</sup>     | 91.4 ± 23        | 108.4 ± 17                   | 105.8 ± 32.4                 | 98.8 ± 23.1                  |
| LIF                  | 69.3 ± 15.6     | 49.6 ± 9.8     | 28.3 ± 10 <sup>#</sup>     | 621.8 ± 889.5 <sup>#</sup>   | 91 ± 18 <sup>#</sup>          | 221.9 ± 134      | 652.4 ± 1252.3               | 184.5 ± 81.3                 | 238.7 ± 135.3                |
| M-CSF                | 3.5 ± 1         | 3.1 ± 0.7      | 2.3 ± 0.2                  | 5.3 ± 3 <sup>#</sup>         | 3.8 ± 0.6                     | 4.7 ± 1.5        | 8.7 ± 6.3                    | 7.3 ± 2.3                    | 5.6 ± 1                      |
| <b>D. Cytokines.</b> |                 |                |                            |                              |                               |                  |                              |                              |                              |
| Eotaxin              | 5619.8 ± 929.3  | 5375.5 ± 162.7 | 4054.8 ± 1102.2            | 7017.4 ± 168.4               | 6010.1 ± 70.1                 | 7199.5 ± 512.1   | 7002.9 ± 252.3               | 7350.2 ± 160.3               | 7222.6 ± 388.8               |
| Gro-alpha/KC         | 268.6 ± 120.3   | 215.5 ± 96.3   | 104.1 ± 48.6               | 754.4 ± 408.5 <sup>#</sup>   | 173.3 ± 17.6                  | 919.2 ± 570.3    | 461.1 ± 125.1 <sup>*</sup>   | 665.1 ± 263.9                | 574.3 ± 242.6 <sup>*</sup>   |
| IP-10                | 717 ± 400.6     | 955.4 ± 470    | 401.6 ± 181.2 <sup>#</sup> | 3361.6 ± 2076.8 <sup>#</sup> | 289.4 ± 53.2 <sup>#</sup>     | 1322.8 ± 350     | 1148.8 ± 422.6               | 1318 ± 728.3                 | 1057.9 ± 228.5               |
| MCP-1                | 868.9 ± 589.2   | 574.2 ± 354.8  | 151.1 ± 130 <sup>#</sup>   | 2927.8 ± 420.1 <sup>#</sup>  | 281.6 ± 237.9                 | 4370.9 ± 2995.6  | 2044.7 ± 569.5 <sup>*</sup>  | 2659.8 ± 1196.6 <sup>*</sup> | 2354.5 ± 1268.9 <sup>*</sup> |
| MCP-3                | 606.8 ± 266.4   | 458.8 ± 56.4   | 247.2 ± 103.2 <sup>#</sup> | 979.8 ± 70.1 <sup>#</sup>    | 372.8 ± 113.5                 | 1168.9 ± 202.6   | 948.1 ± 101.9                | 1116.3 ± 208.5               | 1044.7 ± 245.3               |
| MIP-1a               | 19 ± 9.1        | 24.3 ± 6.4     | 10.9 ± 3.7 <sup>#</sup>    | 54.4 ± 8.9 <sup>#</sup>      | 13.5 ± 5 <sup>#</sup>         | 85.3 ± 59.1      | 66.9 ± 15.5                  | 101.8 ± 30                   | 89.3 ± 47.2                  |
| MIP-1b               | 21.9 ± 12.5     | 18.6 ± 8.6     | 9.1 ± 5.1                  | 68 ± 25.8 <sup>#</sup>       | 10.4 ± 7.4                    | 49.7 ± 21.3      | 46.5 ± 12.1                  | 57.8 ± 24.5                  | 74.4 ± 51.3                  |
| MIP-2                | 39 ± 26.7       | 46.9 ± 59.3    | 9.7 ± 3                    | 197 ± 215.4 <sup>#</sup>     | 15.5 ± 1.6                    | 194.2 ± 227.7    | 52.1 ± 26.4 <sup>*</sup>     | 109 ± 76.6                   | 103.7 ± 91.5                 |
| RANTES               | 907 ± 444.5     | 680.8 ± 106.3  | 544.2 ± 310                | 2118.5 ± 1277.9 <sup>#</sup> | 683.6 ± 7.5                   | 1853.4 ± 617.5   | 2074.2 ± 615.4               | 2074.4 ± 575.8               | 1963.8 ± 762.4               |
